# Supplementary material for: Temperature-Responsive Polysaccharide Microparticles Containing Nanoparticles: Release of Multiple Cationic/Anionic Compounds
Source: MDPI journal article supplement (doi:10.3390/ma15134717), 2022-07-05
Supplement: s1 [file s1]

**Supplementary material for**

**Temperature-Responsive Polysaccharide Microparticles Containing Nanoparticles: Release of Multiple Cationic/Anionic Compounds**

Takumi Sato, Yoshihiko Murakami\*

*Department of Organic and Polymer Materials Chemistry, Faculty of Engineering, Tokyo University of Agriculture and Technology*

\*Corresponding author

Department of Organic and Polymer Materials Chemistry, Faculty of Engineering, Tokyo University of Agriculture and Technology, 2-24-16 Naka-cho, Koganei, Tokyo 184-8588, Japan

*E-mail address:* muray@cc.tuat.ac.jp (Y. Murakami)

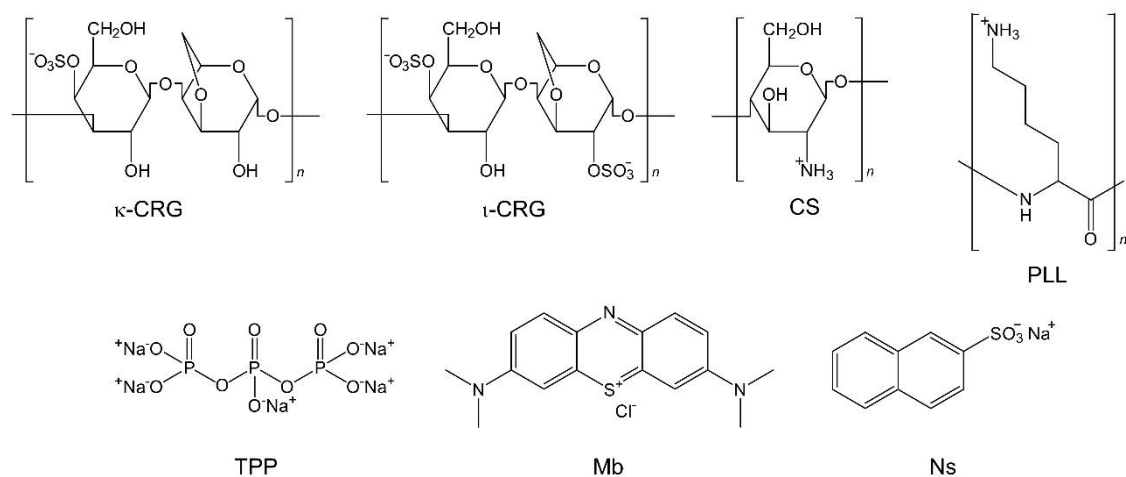

**Figure S1.** Chemical structures of the polymers (CRGs, CS, and PLL) and compound (TPP) used to form particles, and their inclusions (Mb and Ns).

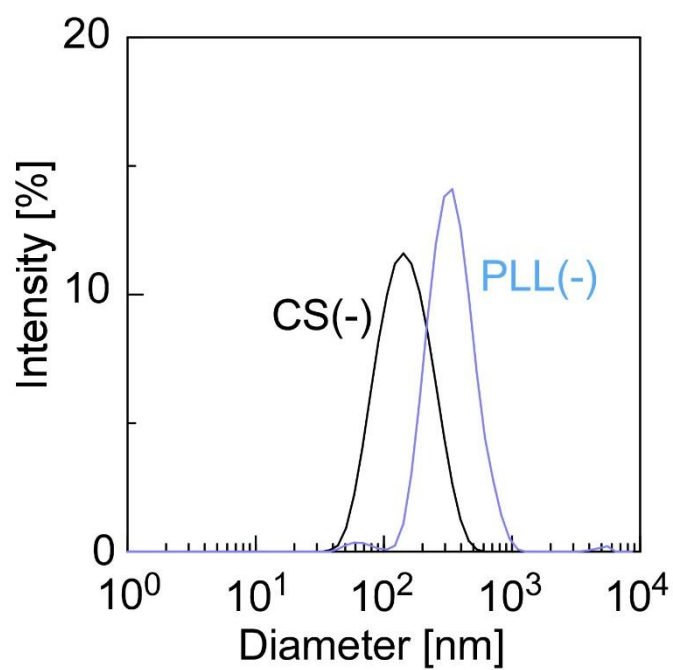

**Figure S2.** DLS-determined diameter distributions of CS(-) and PLL(-) nanoparticles.

**Table S1.** Encapsulation ratios and encapsulation efficiencies for Ns in CS(Ns) and PLL(Ns) nanoparticles.

| Nanoparticle | Encapsulation ratio [%] | Encapsulation efficiency [%] |
|--------------|-------------------------|------------------------------|
| CS(Ns)       | $19.6 \pm 4.8$          | $33.3 \pm 8.1$               |
| PLL(Ns)      | $42.8 \pm 5.9$          | $37.2 \pm 5.1$               |

**Table S2.** Retention ratios and retention efficiencies for CS(Ns) and PLL(Ns) nanoparticles inside CRG(CS(Ns), Mb) and CRG(PLL(Ns), Mb) microparticles

| Microparticle    | Nanoparticle | Retention ratio [%] | Retention efficiency [%] |
|------------------|--------------|---------------------|--------------------------|
| CRG(CS(Ns), Mb)  | CS(Ns)       | $0.31 \pm 0.03$     | $51.6 \pm 10.1$          |
| CRG(PLL(Ns), Mb) | PLL(Ns)      | $0.087 \pm 0.04$    | $60.8 \pm 11.0$          |

**Table S3.** Encapsulation ratios and encapsulation efficiencies of the Mb inside CRG(CS(Ns), Mb) and CRG(PLL(Ns), Mb) microparticles

| Microparticle    | Encapsulation ratio [%] | Encapsulation efficiency [%] |
|------------------|-------------------------|------------------------------|
| CRG(CS(Ns), Mb)  | $0.49 \pm 0.04$         | $15.6 \pm 2.5$               |
| CRG(PLL(Ns), Mb) | $0.44 \pm 0.01$         | $13.7 \pm 0.69$              |
